# Supplementary material
Source: MDPI journal article supplement (https://www.mdpi.com/1424-2818/14/12/1023)
Supplement: s1 [file s1]

Archive with 2 entries (2 files):
- Supplementary table S1.pdf
- Supplementary figures.pdf
