# Supplementary material
Source: MDPI journal article supplement (https://www.mdpi.com/1424-2818/14/12/1023)
Supplement: s1 [file s1 › Supplementary figures.pdf]

# Supplementary Figures

## **New strain of *Cyphellophora olivacea* exhibits striking tolerance to sodium bicarbonate**

LAJOS ACS-SZABO\*, LASZLO ATTILA PAPP,  
HAJNALKA CSOMA, IDA MIKLOS &  
MATTHIAS SIPICZKI

*Department of Genetics and Applied Microbiology,  
Faculty of Science and Technology, University of  
Debrecen, 4032 Debrecen, Hungary*

\* [acs-szabo.lajos@science.unideb.hu](mailto:acs-szabo.lajos@science.unideb.hu)

## Supplementary Figure S1.

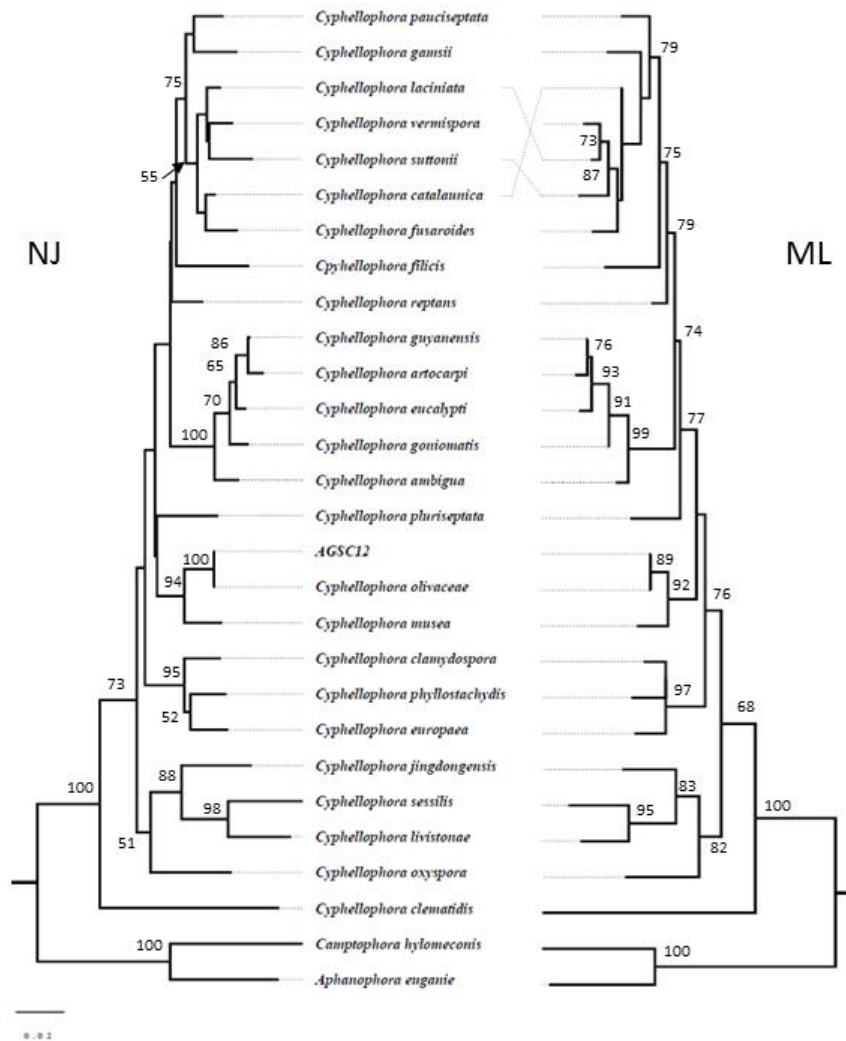

**Supplementary Figure S1.** Phylogenetic analyses of the strain AGSC12 and other *Cyphellophora* species using different methods. NJ: Neighbour Joining tree with bootstrap analysis. ML: Maximum Likelihood tree with aLRT. Only bootstrap and aLRT values bigger than 50 are shown. Although the two trees showed some minor differences in their topology, the strain AGSC12 clustered to the same branch with the *C. olivacea* ex-type strain in both cases.

## Supplementary Figure S2.

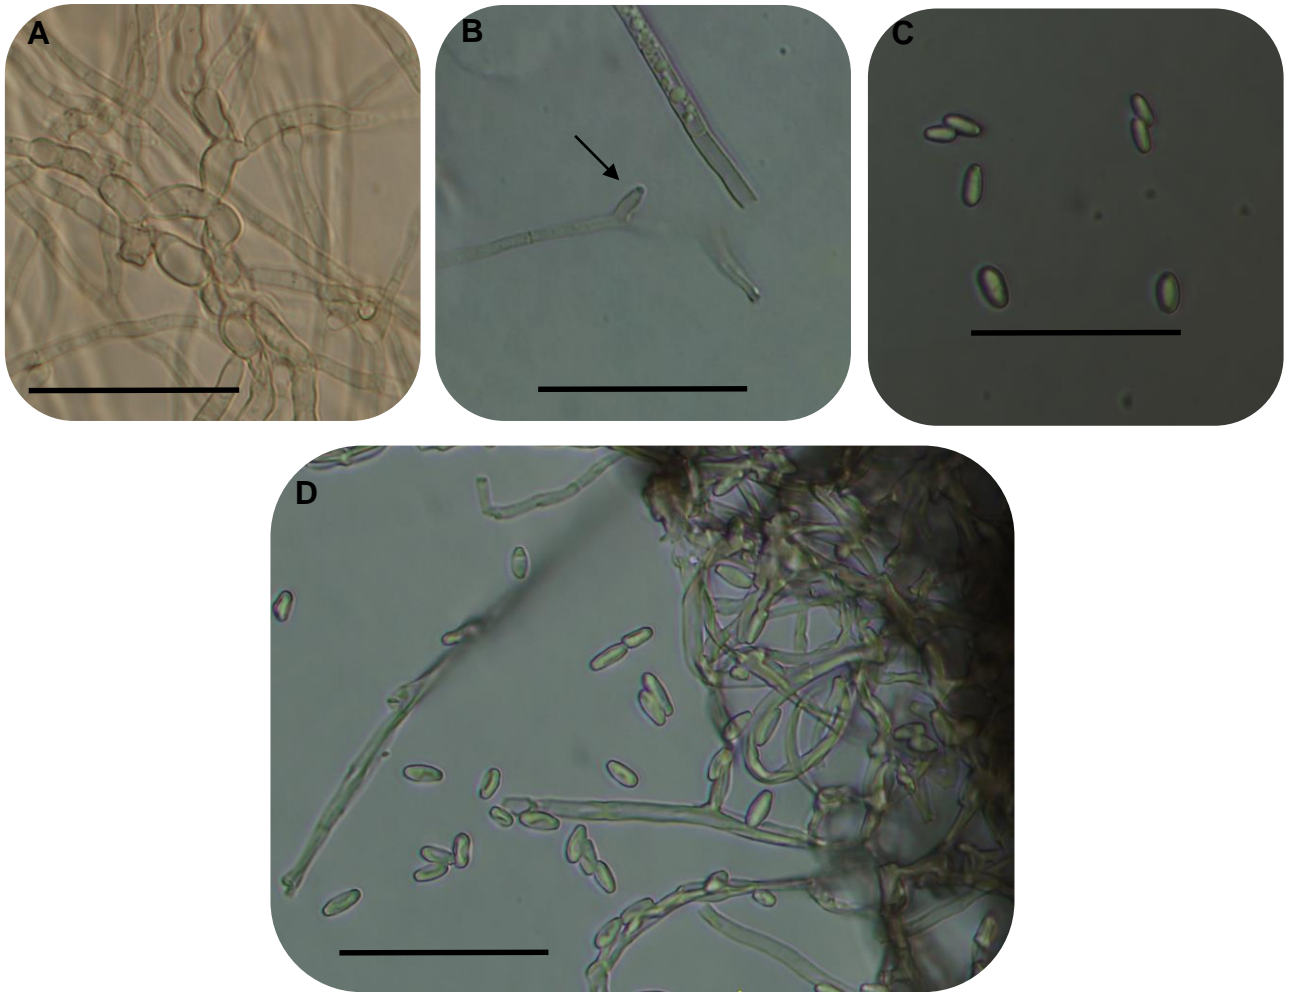

**Supplementary Figure S2.** (A) Microscopic morphology of young (thin and smooth) and old (thick and bulky) hyphae. (B) Lateral phialide is shown by the black arrow. (C) Conidia. (D) Conidia among the hyphal net. Scale bars: 10 μm.

## Supplementary Figure S3.

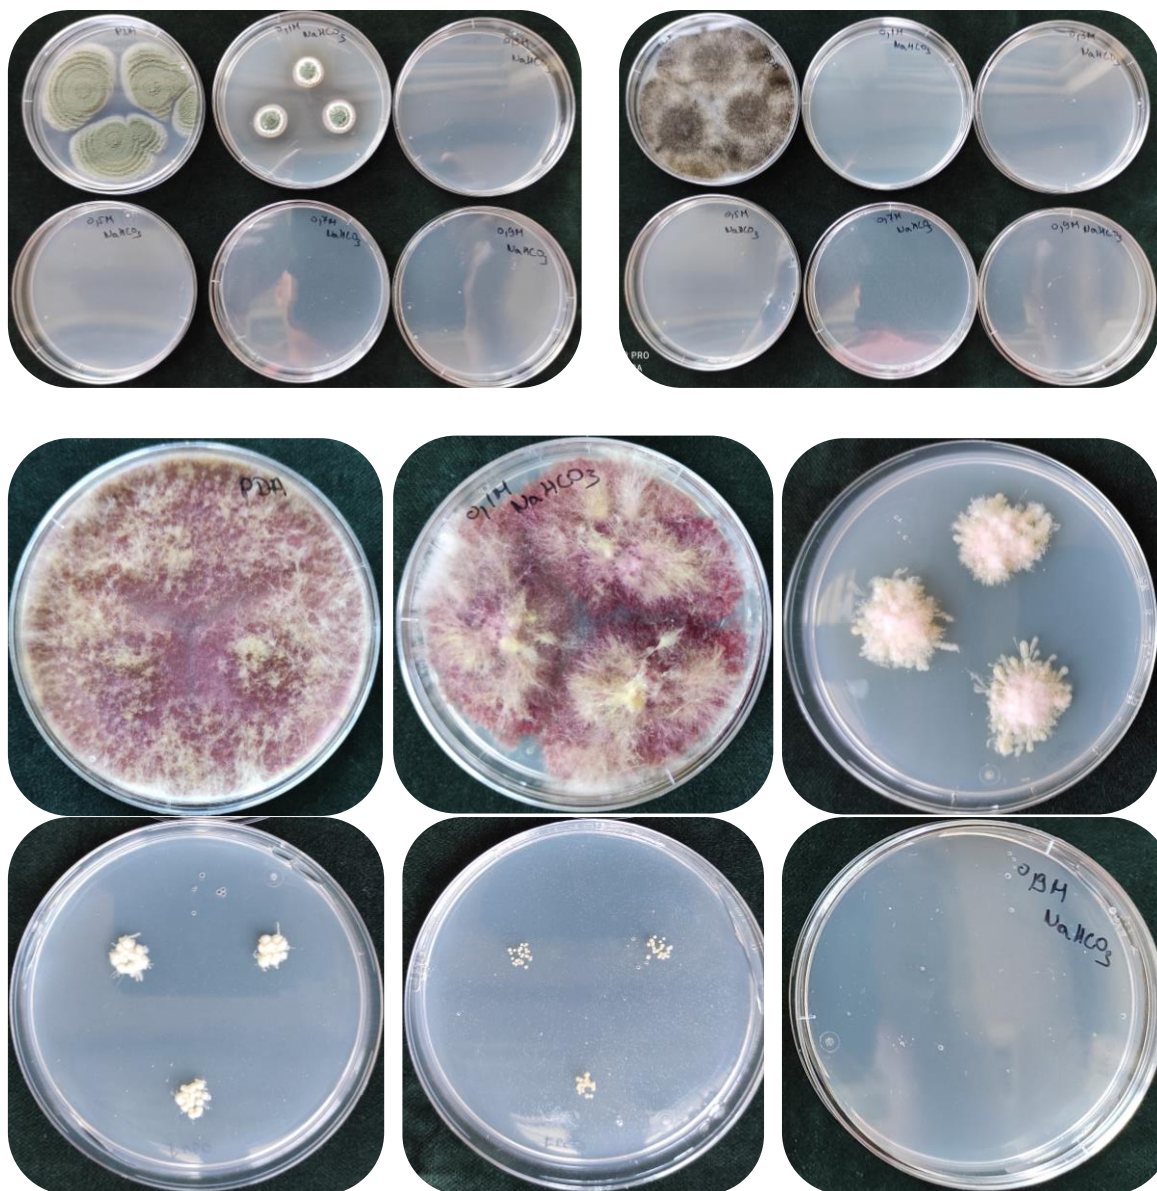

**Supplementary Figure S3.** Colony forming ability of the examined fungal strains on  $\text{NaHCO}_3$ (II.)-containing PDA plates. Green mold: *Penicillium expansum* SZMC 2175, blackish mold: *Aspergillus niger* CBS 554.65, Reddish-yellowish mold: *Fusarium graminearum* FGSC 9075. The  $\text{NaHCO}_3$  concentrations are the following in the top line from left to right: 0.0M (control), 0.1M, 0.3M and in the bottom line from left to right: 0.5M, 0.7M, 0.9M. None of the tested strains was able to produce colonies at all the different concentrations. *P. expansum* and *A. niger* showed extreme intolerance to  $\text{NaHCO}_3$  (II.). *F. graminearum* was able to initiate colony formation even at 0.7M concentration, but only at 0.1M concentration produced normal colonies compared to the untreated control. Photos were taken after 14 days of cultivation.

## Supplementary Figure S4.

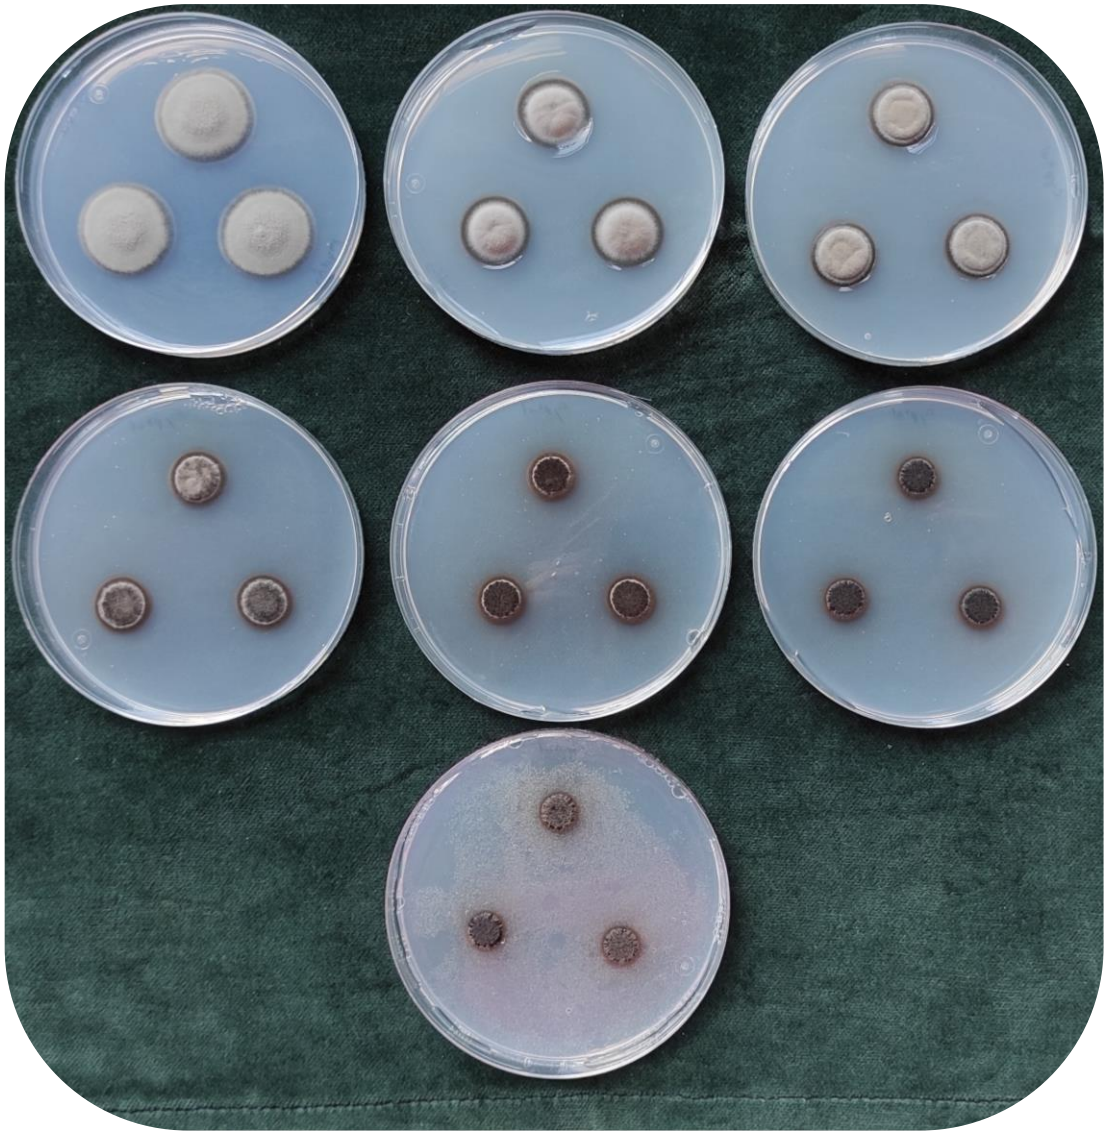

**Supplementary Figure S4.** Colony forming ability of the fungal strain AGSC12 on NaHCO<sub>3</sub>(II.)-containing PDA plates. The NaHCO<sub>3</sub> concentrations are the following in the top line from left to right: 0.0M (control), 0.1M, 0.3M and in the middle line from left to right: 0.5M, 0.7M, 0.9M and the bottom line: 1.1M. The strain was able to produce colonies at all the different concentrations. Photos were taken after 14 days of cultivation.

## Supplementary Figure S5.

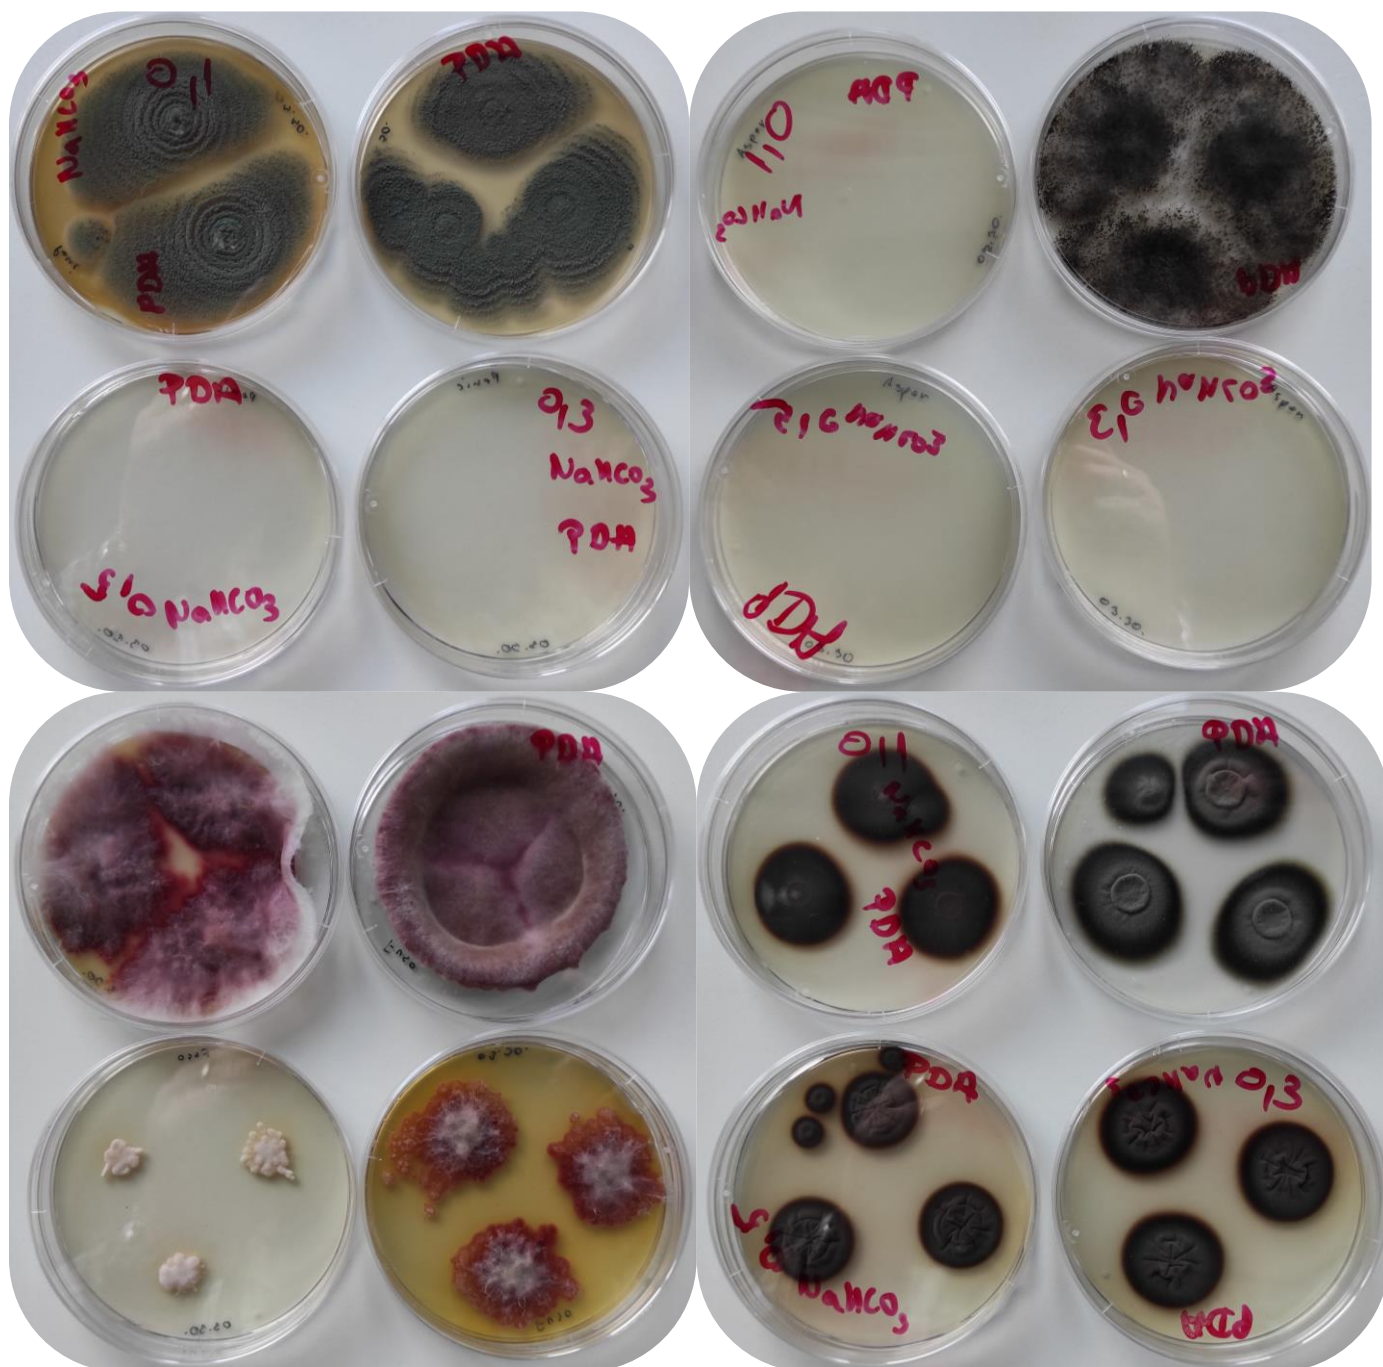

**Supplementary Figure S5.** Colony forming ability of the examined fungal strains on  $\text{NaHCO}_3$ (I.)-containing PDA plates. Green mold: *Penicillium expansum* SZMC 2175, blackish mold: *Aspergillus niger* CBS 554.65, Reddish mold: *Fusarium graminearum* FGSC 9075, grey colonies: *Cyphellophora olivacea* AGSC12. The  $\text{NaHCO}_3$  concentrations are the following in the top line from left to right: 0.1M, 0.0M (control) and in the bottom line from left to right: 0.5M, 0.3M. Only the AGSC12 strain from the tested strains was able to produce normal colonies at all the different concentrations. *P. expansum* and *A. niger* showed extreme intolerance to  $\text{NaHCO}_3$  (I.). *F. graminearum* was able to initiate colony formation even at 0.5M concentration, but only at 0.1M concentration produced normal colonies compared to the untreated control. Photos were taken after 27 days of cultivation.

The image displays a 3x2 grid of petri dishes containing agar, illustrating the growth of *Aspergillus niger*. The top row shows the initial state: the left dish has a large, fuzzy, orange-brown mold covering most of the agar, while the right dish is clear. The middle row shows the mold spreading across the agar. The bottom row shows the mold forming distinct, circular colonies.

**Supplementary Figure S6.** Colony forming ability of the fungal strains *F. graminearum* FGSC 9075 and *C. olivacea* AGSC12 on NaHCO<sub>3</sub>(I.)-containing PDA plates. The NaHCO<sub>3</sub> concentrations are the following in the top line from left to right: 0.0M (control), 0.7M and in the bottom line from left to right: 0.9M, 1.1M. Only the AGSC12 strain was able to produce colonies at all the different concentrations. Photos were taken after 7 days of cultivation.
