# Supplementary material
Source: MDPI journal article supplement (https://www.mdpi.com/1424-2818/14/12/1023)
Supplement: s1 [file s1 › Supplementary table S1.pdf]

**Supplementary table S1.** List of type strains used in this study for the phylogeny. Accession numbers in the ITS column are GenBank entries.

| Species                                                     | Strain       | Origin                                                                     | ITS       | Authors and references                                                                         | Mycobank entry |
|-------------------------------------------------------------|--------------|----------------------------------------------------------------------------|-----------|------------------------------------------------------------------------------------------------|----------------|
| <i>Cyphellophora ambigua</i>                                | CBS 235.93   | man, toenail, Netherlands                                                  | JQ766431  | (P. Feng & de Hoog) Réblová & Unter., PLoS One 8 (5): 12 (2013) [33,34]                        | MB#803697      |
| <i>Cyphellophora artocarp</i>                               | CHC-JHBJ-BLM | twig of <i>Artocarpus heterophyllus</i> , China                            | KP010367  | G.Y. Sun & Liu Gao, PLoS One 10 (9): 10 (2015) [35]                                            | MB#811436      |
| <i>Cyphellophora catalaunica</i>                            | CPC 22929    | sediments of river, Spain                                                  | HG003670  | Madrid, Gene, Guarro & Crous, Persoonia 31: 273 (2013) [36]                                    | MB#805277      |
| <i>Cyphellophora chlamydospora</i>                          | CBS 127581   | soil, Spain                                                                | HG003674  | Madrid, Hern.-Restr., Cano, Gené, Guarro & V. Silva, Mycological Progress 15: 1186 (2016) [37] | MB#809813      |
| <i>Cyphellophora clematidis</i>                             | CBS 144983   | surface of <i>Clematis vitalba</i> , Austria                               | NR_163356 | Crous & R.K. Schumacher., Fungal Systematics and Evolution 3: 77 (2019) [38]                   | MB#829301      |
| <i>Cyphellophora eucalypti</i>                              | CBS 124764   | leaves of <i>Eucalyptus</i> sp., Australia ( <i>C. eucalypti</i> )         | NR_165944 | Cheewangkoon. & Crous, Persoonia 23: 63 (2009) [39]                                            | MB#513844      |
| <i>Aphanophora</i> ( <i>Cyphellophora</i> ) <i>eugeniae</i> | CBS 124105   | leaves of <i>Eugenia uniflora</i> (= <i>Stenocalyx uniflorus</i> ), Brazil | NR_132829 | Crous & Alfenas, Persoonia 22: 147 (2009) [40]                                                 | MB#509521      |
| <i>Cyphellophora europaea</i>                               | CBS 101466   | man skin, foot, Netherlands                                                | KC455246  | (de Hoog, Mayser & Haase) Réblová & Unter., PLoS One 8 (5): 12 (2013) [34,41]                  | MB#803683      |
| <i>Cyphellophora filicis</i>                                | DP002A       | dead fronds of a fern, Thailand                                            | MK404056  | Hongsanan, Phookamsak & K.D. Hyde, Fungal Diversity 95: 89 (2019) [42]                         | MB#556179      |
| <i>Cyphellophora fusarioides</i>                            | MUCL 44033   | man, bronchial lavage fluid, Israel                                        | KC455239  | (B. Sutton & C.K. Campb.) Decock, Antonie van Leeuwenhoek 84 (3): 213 (2003) [43]              | MB#487997      |
| <i>Cyphellophora gamsii</i>                                 | CPC 25867    | leaf litter, Thailand                                                      | NR_156306 | Crous, Persoonia 36: 333 (2016) [44]                                                           | MB#817005      |
| <i>Cyphellophora goniomatis</i>                             | CPC 37032    | leaves of <i>Gonioma kamassi</i> , South-Africa                            | NR_166332 | Crous, Persoonia 43: 299 (2019) [45]                                                           | MB#832891      |
| <i>Cyphellophora guyanensis</i>                             | MUCL 43737   | dead leaf of an undetermined angiosperm, French Guyana                     | KC455238  | Decock & G. Delgado, Antonie van Leeuwenhoek 84 (3): 210 (2003) [43]                           | MB#488295      |

|                                                |              |                                                            |           |                                                                                          |           |
|------------------------------------------------|--------------|------------------------------------------------------------|-----------|------------------------------------------------------------------------------------------|-----------|
| <i>Camptophora (Cyphellophora) hylomeconis</i> | CBS 113311   | leaves of <i>Hylomecon vernalis</i> , Korea                | NR_132881 | Crous, de Hoog & H.D. Shin, Studies in Mycology 58: 200 (2007) [46]                      | MB#504532 |
| <i>Cyphellophora indica</i>                    | No data      |                                                            | No data   | (M. Jacob & Bhat) Decock, Antonie van Leeuwenhoek 84 (3): 212 (2003) [43]                | MB#487999 |
| <i>Cyphellophora jingdongensis</i>             | IFRDCC 2659  | surface of leaves, China                                   | MF285234  | H. Yang & K.D. Hyde, Phytotaxa 343 (2): 153 (2018) [47]                                  | MB#554236 |
| <i>Cyphellophora laciniata</i>                 | CBS 190.61   | man skin, Switzerland                                      | EU035416  | G.A. de Vries, Mycopathologia et Mycologia Applicata 16: 47 (1962) [48]                  | MB#329520 |
| <i>Cyphellophora livistoniae</i>               | CBS 133589   | leaves of <i>Livistona humilis</i> , Australia             | KC005774  | (Crous & Summerell) Madrid & Hern.-Restr., Mycological Progress 15: 1193 (2016) [37]     | MB#809814 |
| <i>Cyphellophora musae</i>                     | CGMCC3.17497 | fruit of <i>Musa basjoo</i> , China                        | KP010370  | G.Y. Sun & Liu Gao, PLoS One 10 (9): 10 (2015) [35]                                      | MB#811438 |
| <i>Cyphellophora olivacea</i>                  | CBS 122.74   | moist wall paper, Germany                                  | KC455247  | (W. Gams) Réblová & Unter., PLoS One 8 (5): 12 (2013) [34,49]                            | MB#803684 |
| <i>Cyphellophora olivacea</i>                  | CBS 123.74   | stem of <i>Chamaerops humilis</i> , Netherlands            | KC455248  | (W. Gams) Réblová & Unter., PLoS One 8 (5): 12 (2013) [34,49]                            | MB#803684 |
| <i>Cyphellophora oxyspora</i>                  | CBS 698.73   | decaying leaf of <i>Clerodendron monahassa</i> , Sri Lanka | KC455249  | (W. Gams) Réblová & Unter., PLoS One 8 (5): 12 (2013) [34,49]                            | MB#803685 |
| <i>Cyphellophora pauciseptata</i>              | CBS 284.85   | man skin, Netherlands                                      | JQ766466  | P. Feng & de Hoog, Fungal diversity 65: 33 (2012) [33]                                   | MB#564874 |
| <i>Cyphellophora phyllostachydis</i>           | HMAS 245769  | twig of <i>Phyllostachys heterocycla</i> , China           | NR_158393 | G.Y. Sun & Liu Gao, PLoS One 10 (9): 8 (2015) [35]                                       | MB#811435 |
| <i>Cyphellophora pluriseptata</i>              | CBS 286.85   | man skin, Netherlands                                      | KC455242  | G.A. de Vries, Elders & Luykx, Antonie van Leeuwenhoek 52 (2): 141 (1986) [50]           | MB#103253 |
| <i>Cyphellophora reptans</i>                   | CBS 113.85   | food, Sweden                                               | NR_121346 | (de Hoog) Réblová & Unter., PLoS One 8 (5): 12 (2013) [34]                               | MB#803686 |
| <i>Cyphellophora sessilis</i>                  | CBS 243.85   | resin of <i>Picea abies</i> , Netherlands                  | NR_132823 | (de Hoog) Réblová & Unter., PLoS One 8 (5): 12 (2013) [34]                               | MB#803687 |
| <i>Cyphellophora suttonii</i>                  | MUCL 44073   | subcutaneous lesion in dog's ear, USA                      | NR_121462 | (Ajello, A.A. Padhye & M. Payne) Decock, Antonie van Leeuwenhoek 84 (3): 213 (2003) [43] | MB#487354 |

|                                  |            |                                            |                                                                              |           |
|----------------------------------|------------|--------------------------------------------|------------------------------------------------------------------------------|-----------|
| <i>Cyphellophora taiwanensis</i> | No data    | No data                                    | Matsush., Matsushima Mycological Memoirs 5: 9 (1987) [51]                    | MB#131826 |
| <i>Cyphellophora vermispora</i>  | MUCL 43739 | root of <i>Triticum aestivum</i> , Germany | NR_121463 A. Walz & de Hoog, Antonie van Leeuwenhoek 53 (3): 143 (1987) [52] | MB#133484 |
